# Supplementary material
Source: PubMed Central journal article supplement (PMC6021648)
Supplement: AAC.02375-17_zac006187221s1.pdf [file AAC.02375-17_zac006187221s1.pdf]

## Supplemental Material

Metabolism of SKLB-TB1001, a potent Anti-tuberculosis Agent, in Animals

Running title: *In Vivo* Metabolism of SKLB-TB1001

Lu Xiong<sup>a,†</sup>, Chao Gao<sup>a,†</sup>, Yao-Jie Shi<sup>a</sup>, Xin Tao<sup>a</sup>, Cui-Ting Peng<sup>a,b</sup>, Juan Rong<sup>a</sup>,  
Kun-Lin Liu<sup>a</sup>, Qian Lei<sup>a</sup>, Yi-Wen Zhang<sup>a</sup>, Ning-Yu Wang<sup>c#</sup> and Luo-TingYu<sup>a#</sup>

State Key Laboratory of Biotherapy and Cancer Center, West China Hospital, Sichuan University and Collaborative Innovation Center, Chengdu 610041, China<sup>a</sup>;

Department of Pharmaceutical and Bioengineering, School of Chemical Engineering, Sichuan University, Chengdu, Sichuan 610065, China<sup>b</sup>.

School of Life Science and Engineering, Southwest JiaoTong University, Sichuan 611756, China<sup>c</sup>

# Corresponding author: yuluot@scu.edu.cn (L.T.Yu)

ningyuwang\_sk1b@scu.edu.cn

†Authors contributed equally.

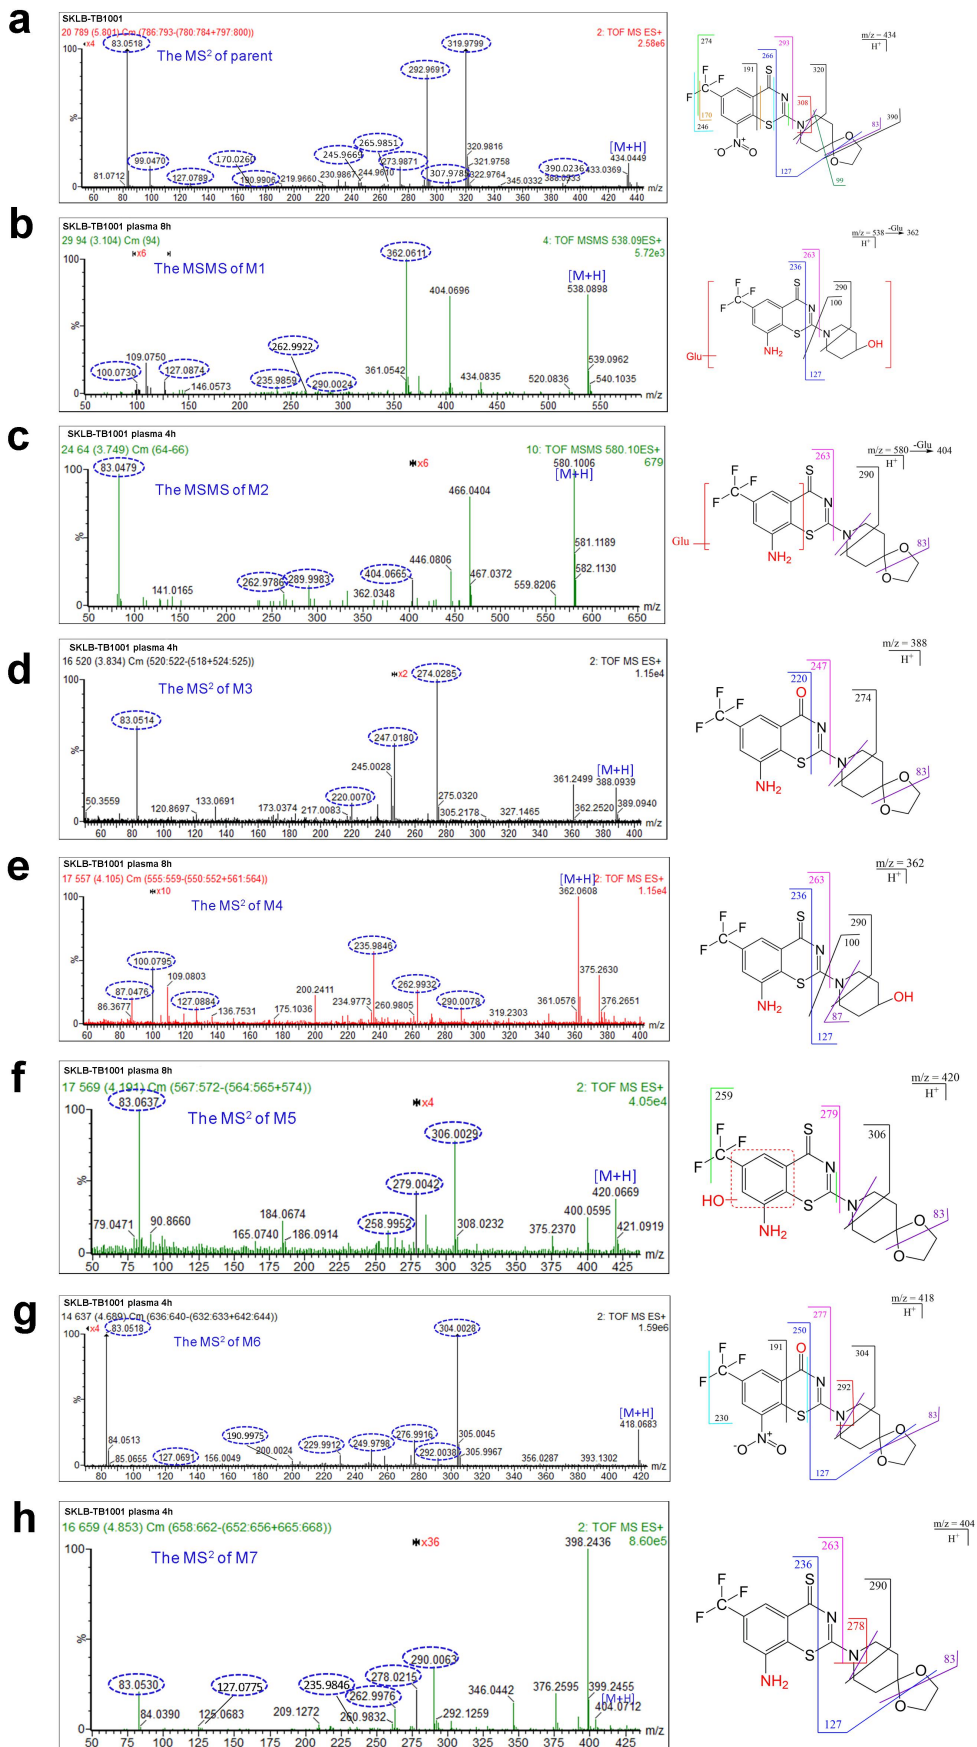

**FIG S1** a. MS fragmentation assignment of SKLB-TB1001; b. M1 was identified as glucuronidation product of M4 (nitro reduction and O-dealkylation product of SKLB-TB1001); c. M2 was identified as glucuronidation product of M7 (nitro reduction product of SKLB-TB1001); d. M3 was identified as a product with replacement of sulfur by oxygen and nitro reduction of SKLB-TB1001; e. M4 was identified as O-dealkylation product of M7 (nitro reduction product of SKLB-TB1001); f. M5 was identified as the nitro reduction and hydroxylation product of SKLB-TB1001; j. M6 was identified as a product with replacement of sulfur by oxygen of SKLB-TB1001; h. M7 was identified as nitro reduction of SKLB-TB1001

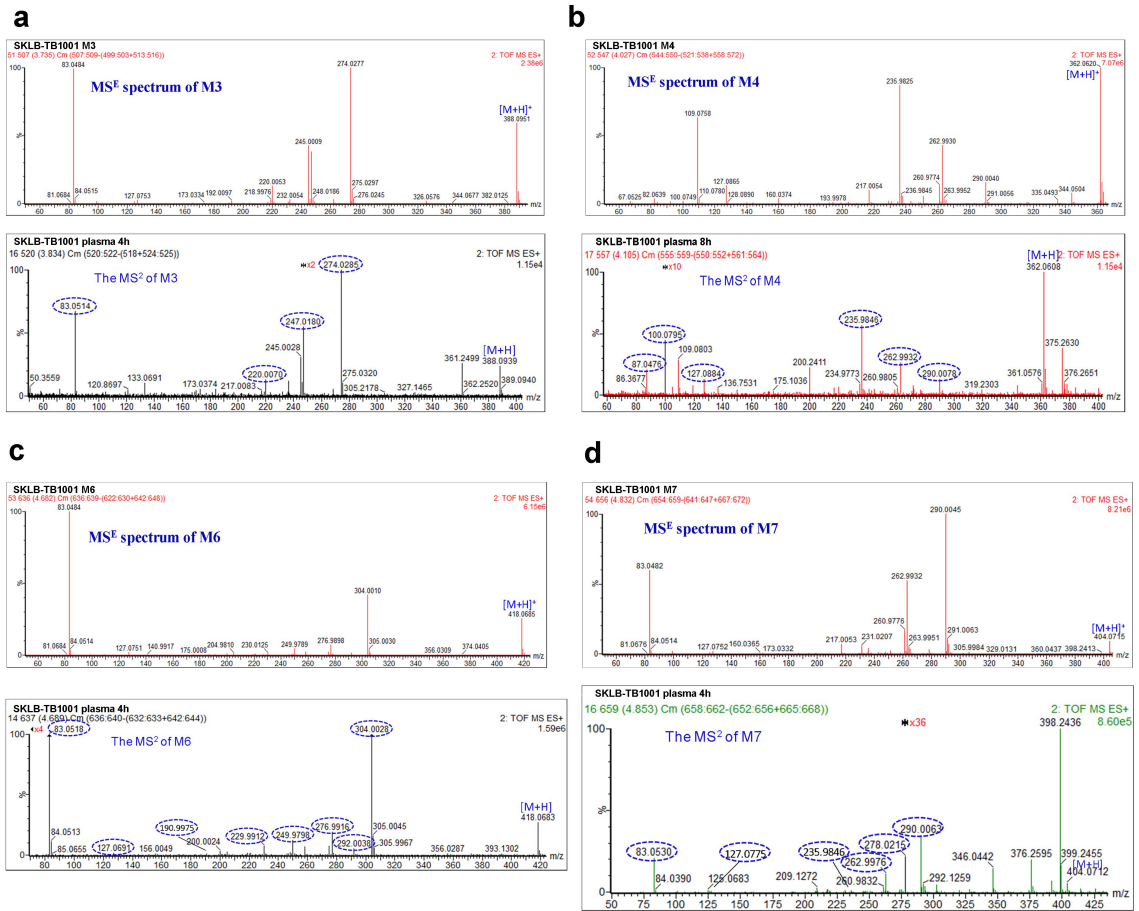

FIG S2 MS<sup>E</sup> spectrum of M3, M4, M6, M7 in synthesized standard and in mice plasma

**Table S1** Individual and mean Lung<sup>a</sup> to plasma ratio concentration-time data of SKLB-TB1001 after PO dose at 50 mg/kg in male CD1 mice

| Lung to plasma ratio |            |                    |                        |       |       |       |        |       |
|----------------------|------------|--------------------|------------------------|-------|-------|-------|--------|-------|
| Dose (mg/kg)         | Dose route | Sampling time (hr) | lung/plasma Individual |       |       | Mean  | SD     | CV(%) |
| 50                   | PO         | 0.25               | 0.216                  | 0.264 | 0.283 | 0.255 | 0.0346 | 13.6  |
|                      |            | 4                  | 0.374                  | 0.429 | 0.293 | 0.365 | 0.0686 | 18.8  |
|                      |            | 8                  | 0.494                  | 0.345 | 0.289 | 0.376 | 0.106  | 28.2  |
|                      |            | 24                 | NA                     | NA    | NA    | NA    | NA     | NA    |

<sup>a</sup> Lung tissue was homogenized with 3 volumes (v/w) of homogenizing solution (PBS, pH7.4) for 2 min.

NA: Not available.

**Table S2** Individual and mean Lung to plasma ratio concentration-time data of M6 after PO dose at 50 mg/kg in male CD1 mice

| Lung to plasma ratio |            |                   |                        |    |       |       |    |       |
|----------------------|------------|-------------------|------------------------|----|-------|-------|----|-------|
| Dose (mg/kg)         | Dose route | Sampling Time(hr) | lung/plasma Individual |    |       | Mean  | SD | CV(%) |
| 50                   | PO         | 0.25              | NA                     | NA | 0.960 | 0.960 | NA | NA    |
|                      |            | 4                 | NA                     | NA | NA    | NA    | NA | NA    |
|                      |            | 8                 | NA                     | NA | NA    | NA    | NA | NA    |
|                      |            | 24                | NA                     | NA | NA    | NA    | NA | NA    |

**Table S3 HPLC condition**

Gradient Program:

| Time(min) | Flow Rate( $\mu$ l/min) | A (%) | B (%) |
|-----------|-------------------------|-------|-------|
| 0.00      | 400                     | 98    | 2     |
| 0.34      | 400                     | 98    | 2     |
| 8.00      | 400                     | 5     | 95    |
| 9.00      | 400                     | 5     | 95    |
| 9.10      | 400                     | 98    | 2     |
| 10.00     | 400                     | 98    | 2     |

Column: Xbridge Acquity UPLC®BEH C18 (2.1×50 mm, 1.7  $\mu$ m)

Mobile Phase: A (H<sub>2</sub>O with 0.1% formic acid)

B (ACN with 0.1% formic acid)

**Table S4 MS condition**

UPLC-UV-G2-S Q-ToF: MS<sup>E</sup> Centroid ESI (+)

|                                            |
|--------------------------------------------|
| <b>Scan Mode:</b> MS <sup>E</sup> Centroid |
| <b>Source</b>                              |
| Capillary (KV): 3.00(+)                    |
| Sampling Cone: 40                          |
| Source Offset: 80                          |
| <b>Temperature (°C)</b>                    |
| Source:120                                 |
| Desolvation: 350                           |
| <b>Gas Flows (L/h)</b>                     |
| Cone Gas: 50                               |
| Desolvation Gas: 600                       |
